# Supplementary material for: A colloidal gold immunochromatographic assay for on-site lead detection in vegetable oil
Source: Royal Society of Chemistry journal article supplement (doi:10.1039/d5an00393h), 2025-01-01
Supplement: d5an00393h1.pdf [file d5an00393h1.pdf]

***SUPPORTING INFORMATION***

**A Colloidal Gold Immunochromatographic Assay for On-site Lead Detection in  
Vegetable Oil**

## **Contents**

**Steps for pre-treatment of samples for analysis by ICP-MS.**

**Fig. S1.** The standard curve of CGIA in PBS.

**Table S1.** The comparison of methods in Pb determination.

**Steps for pre-treatment of samples for analysis by ICP-MS.**

First, 0.5 g of the sample was placed in an appropriate container, then 5 mL of  $\text{HNO}_3$ , and 3 mL of  $\text{H}_2\text{O}_2$  are added. The sample was heated until thick white smoke appears. After cooling to room temperature, 2 mL of  $\text{HNO}_3$  was added, and the sample is heated again to dissolve the soluble residue. The sample was then filtered through a 25 nm filter membrane and finally analyzed by ICP-MS.<sup>1, 2</sup>

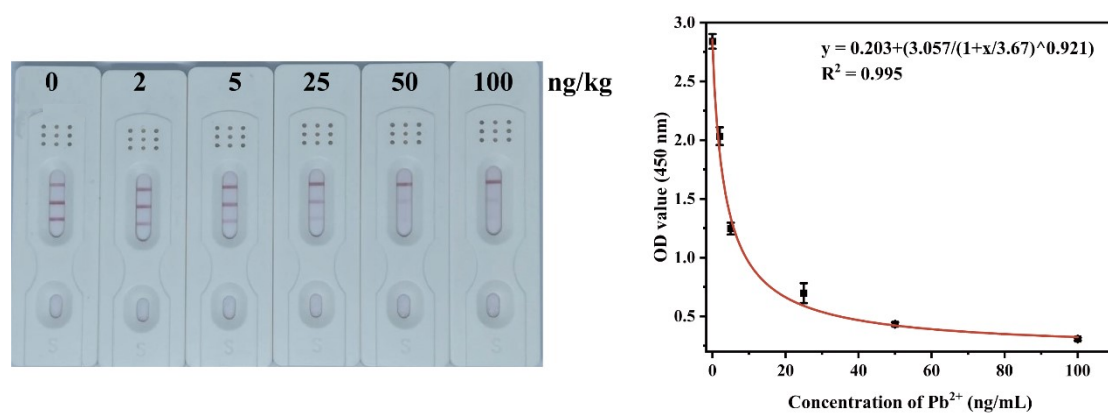

**Fig. S1.** The standard curve of CGIA in PBS.

**Table S1.** The comparison of methods in Pb determination.

| Method                                          | Samples       | Analyte | LOD (mg/kg) | Time     | Reference  |
|-------------------------------------------------|---------------|---------|-------------|----------|------------|
| Atomic absorption spectrometry                  | Edible oil    | Pb      | 0.010       | > 30 min | [3]        |
| Graphite Furnace Atomic Absorption Spectrometry | Vegetable oil | Pb      | 0.016       | > 30 min | [4]        |
| Inductively Coupled Plasma - Mass Spectrometry  | Edible oil    | Pb      | 0.5         | > 1 h    | [5]        |
| CGIA                                            | Vegetable oil | Pb      | 0.021       | < 30 min | This study |

## References

1. M. F. Luka and E. Akun, *Environ. Earth Sci.*, 2019, **78**, 578.
2. A. Mohajer, A. N. Baghani, P. Sadighara, K. Ghanati and S. Nazmara, *J. Food Compos Anal*, 2020, **86**, 103384.
3. I. López-García, Y. Vicente-Martínez and M. Hernández-Córdoba, *Talanta*, 2014, **124**, 106-110.
4. C. V. S. Ieggli, B. D., D. N. P. C. and L. M. and De Carvalho, *Food Addit. Contam.: Part A*, 2011, **28**, 640-648.
5. F. Gregar, J. Grepl, D. Milde and T. Pluháček, *Food Chem.*, 2024, **447**, 139010.
